# Supplementary material for: Relations between Sensory Responsiveness and Features of Autism in Children
Source: PubMed Central journal article supplement (PMC7690864; doi:10.3390/brainsci10110775), 2020-10-24
Supplement: brainsci-10-00775-s001.pdf [file brainsci-10-00775-s001.pdf]

**File S1.** Information on flexible use of terminology.

There is some debate in the literature regarding whether researchers should utilize person-first language (e.g., individuals with autism, individuals with ASD) versus identity-first language (e.g., autistic individuals). Clinicians and researchers tend to prefer person-first language, while many autistic individuals and their allies prefer and advocate for identity-first language [1,2]. In this manuscript, we refer to children with autism using person-first language while otherwise avoiding ableist language [3], and acknowledge that this approach may not be received equally by all of the stakeholders of our research.

1. Gernsbacher, M.A. Editorial perspective: The use of person-first language in scholarly writing may accentuate stigma. *J. Child Psychol. Psychiatry* **2017**, *58*, 859–861, doi:10.1111/jcpp.12706.
2. Kenny, L.; Hattersley, C.; Molins, B.; Buckley, C.; Povey, C.; Pellicano, E. Which terms should be used to describe autism? Perspectives from the UK autism community. *Autism* **2016**, *20*, 442–462, doi:10.1177/1362361315588200.
3. Bottema-Beutel, K.; Kapp, S.K.; Lester, J.N.; Sasson, N.J.; Hand, B.N. Avoiding ableist language: Suggestions for autism researchers. *Autism Adulthood* **2020**, doi:10.1089/aut.2020.0014.

**Table S1.** Partial correlations between patterns of sensory responsiveness and core and related features of autism controlling for nonverbal IQ.

|                                                | Hypo    | Hyper   | Seeking |
|------------------------------------------------|---------|---------|---------|
| <b>Core Features of Autism</b>                 |         |         |         |
| SRS Social Communication T-score               | .85***  | .81***  | .57***  |
| SRS RRB T score                                | .77***  | .78***  | .69***  |
| Core Autism Feature Aggregate                  | .87***  | .82***  | .63***  |
| <b>Related Features of Autism</b>              |         |         |         |
| VABS Communication SS                          | -.70*** | -.62*** | -.51*** |
| VABS Daily Living Skills SS                    | -.64*** | -.61*** | -.38**  |
| VABS Socialization SS                          | -.79*** | -.73*** | -.52*** |
| BASC Anxiety T score                           | .42***  | .61***  | .27*    |
| BASC Depression T score                        | .62***  | .70***  | .50***  |
| BASC Somatization T score                      | .33**   | .42***  | .14     |
| BASC Internalizing Problem Behaviors T score   | .55***  | .68***  | .37**   |
| BASC Functional Impairment Probability T score | .79***  | .80***  | .61***  |
| <b>Language</b>                                |         |         |         |
| ROWPVT SS                                      | -.24    | -.18    | -.28**  |
| EOWPVT SS                                      | -.23    | -.18    | -.19    |
| CELF Receptive Language SS                     | -.31*   | -.26*   | -.32**  |
| CELF Expressive Language SS                    | -.33**  | -.26*   | -.34**  |
| CELF Core Language SS                          | -.35**  | -.29*   | -.38**  |

*Note.* Nonverbal IQ = Nonverbal intelligence as measured by the Leiter International Performance Scale–3rd edition [41] or the Test of Nonverbal Intelligence–4th edition [40], Hypo = hyporesponsiveness aggregate score, Hyper = hyperresponsiveness aggregate score, Seeking = sensory seeking aggregate score, SRS = Social Responsiveness Scale [45], Core Autism Feature Aggregate = Aggregate of SRS total T score and Social Communication Questionnaire total score [43], SS = Standard score, VABS = Vineland Adaptive Behavior Scales–2nd edition [46], BASC = Behavior Assessment System for Children–3rd edition [47], ROWPVT = Receptive One Word Picture Vocabulary Test–4th edition [48], EOWPVT = Expressive One Word Picture Vocabulary Test–4th edition [49], CELF = Clinical Evaluation of Language Fundamentals–4th edition [50]

\* $p < .05$ , \*\* $p < .01$ , \*\*\* $p < .001$  after applying a Benjamini-Yekutieli correction [53]
